# Supplementary material
Source: MDPI journal article supplement (https://www.mdpi.com/2079-6412/9/6/396)

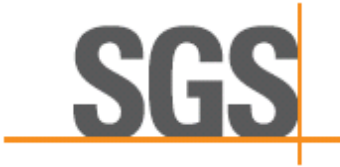

# **Magnesium Alloy Specimen Skin Sensitization Study (Maximization Test)**

## **FINAL REPORT**

**Sponsor: Metal Industries Research & Development Centre**  
**Testing Institution: SGS Taiwan Ltd.**  
**Report No.: UP/2014/60049A-02**

- Note:**
1. The content of this report is invalid if it is not presented as the entire report.
  2. Any unauthorized alteration, forgery or falsification of the content or appearance of this report is unlawful and offenders may be prosecuted to the fullest extent of the law.
  3. The results shown in this test report refer only to the test article(s) tested.
  4. The analytical report is the test result issued by the testing institutions as requested by the consignor.  
Regarding to the legitimacy of the product, it shall be determined by the authorities according to the law.
  5. The report is the Chinese version of translations UB/2014/60049A-02

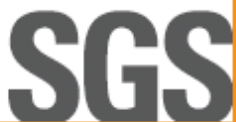

**STUDY SCHEDULE**  
**Skin Sensitization Study (Maximization Test)**  
**Magnesium Alloy Specimen**

---

|                               |                                                   |
|-------------------------------|---------------------------------------------------|
| Report No.:                   | UP/2014/60050A-04                                 |
| Experimental starting date:   | 2014.11.21                                        |
| Experimental completion date: | 2014.12.26                                        |
| Study completion date:        | See Study Director's signature date in the report |

---

**ADDRESS INFORMATION**

**Testing Facility/ Test Site**

**Name:** SGS TAIWAN LTD.  
**Address:** No. 38, Wu Chyuan 7th Rd., New Taipei Industrial Park, Wu Ku Dist.,

**Study Director**

**Name:** Biocompatibility Lab. Of LEON Biotech. Co., Ltd.  
**Address:** 4f.-2, No.288-8, Xinya Rd., Qianzhen Dist., Kaohsiung City 806, Taiwan

**Sponsor**

**Name:** Metal Industries Research & Development Centre  
**Address:** 3F, No.88, Luke 5th Rd., Luzhu Dist., Kaohsiung City, Taiwan 82151, R.O.C.  
(Kaohsiung Science Park)

## INFORMATION FOR TEST ARTICLE

### ☒ 試驗物質 ☐ 對照物質 資料表

|                         |                                                                                                                                                                                                                               |  |  |
|-------------------------|-------------------------------------------------------------------------------------------------------------------------------------------------------------------------------------------------------------------------------|--|--|
| 委託單位名稱                  | 金屬工業研究發展中心                                                                                                                                                                                                                    |  |  |
| 委託單位地址                  | 82151 高雄市路竹區路科五路88號3樓                                                                                                                                                                                                         |  |  |
| 委託試驗項目                  | <input checked="" type="checkbox"/> 以合約為主 <input type="checkbox"/> 其它：                                                                                                                                                        |  |  |
| 試驗物質/對照物質名稱             | 鎂合金試片                                                                                                                                                                                                                         |  |  |
| 批號                      | <input type="checkbox"/> 依據特定編號：<br><input type="checkbox"/> 依據包裝上日期：<br><input checked="" type="checkbox"/> 無批號可提供                                                                                                           |  |  |
| 規格數量                    | 45.6cm2/片*11片 (如 10mL/瓶*6瓶)                                                                                                                                                                                                   |  |  |
| 提供之同批號量 (註2)            | <input checked="" type="checkbox"/> 1次之測試使用 <input type="checkbox"/> 2次以上之測試使用(留樣用)                                                                                                                                           |  |  |
| 外觀型態                    | 型態：<br><input type="checkbox"/> 液狀 <input type="checkbox"/> 粉狀 <input type="checkbox"/> 錠狀 <input type="checkbox"/> 膠囊狀<br><input checked="" type="checkbox"/> 其他：片狀                                                          |  |  |
| 主要成分及純度                 | 成分：鎂 純度：90%以上                                                                                                                                                                                                                 |  |  |
| 適合之溶劑及其溶解度              | N/A                                                                                                                                                                                                                           |  |  |
| 保存條件                    | 保存條件： <input type="checkbox"/> 室溫 <input type="checkbox"/> 4℃ <input type="checkbox"/> 避光 <input checked="" type="checkbox"/> 其他 真空包裝                                                                                         |  |  |
| 保存期限(註3)                | <input type="checkbox"/> 有效期限：西元 年 月 日 或<br><input type="checkbox"/> 保存期間：共 年 月 日 或<br><input checked="" type="checkbox"/> 依SGS UB之留樣保存期限為主                                                                                   |  |  |
| 檢附之文件(註4)               | <input type="checkbox"/> 分析證明 <input type="checkbox"/> 安全資料表 <input type="checkbox"/> 安定性測試結果 <input checked="" type="checkbox"/> 無附件(註4)<br><input type="checkbox"/> 其他：                                                     |  |  |
| 滅菌                      | 產品是否已滅菌 <input type="checkbox"/> 是 <input type="checkbox"/> 否 (如勾選YES請再勾選下方滅菌方法)<br>滅菌方法是 <input type="checkbox"/> EO滅菌 <input checked="" type="checkbox"/> Gamma滅菌 <input type="checkbox"/> 蒸汽滅菌 <input type="checkbox"/> 其他 |  |  |
| 醫療器材使用之範疇<br>(非醫療器材者免填) | 1. <input type="checkbox"/> 與皮膚或黏膜短期接觸(接觸人體累積時間)<br><input type="checkbox"/> 短期接觸(不超過4 hr)<br><input type="checkbox"/> 長期接觸(超過4 hr以上)，最長累積時數為 小時<br>2. <input checked="" type="checkbox"/> 植入式的醫療器材                           |  |  |
| 特殊需求(註5)                | N/A                                                                                                                                                                                                                           |  |  |
| 客戶簽名/日期：                | 2013.12.25                                                                                                                                                                                                                    |  |  |

註1. 上述所有資料是由客戶提供並負責。  
 註2. 若試驗委託者無法提供試驗/對照物質每一批具代表性之備用試驗/對照物質，其留存樣由委託單位自行存放負責。  
 註3. 若試驗物質/對照物質之保存期間少於5年，實驗室之留樣保存期限則以客戶提供之保存期間為主；若試驗物質/對照物質之保存期間大於5年，實驗室之留樣保存期限則為5年。  
 註4. 試驗物質/對照物質的本質，包含批號、純度、濃度、成份、合成、製造方法、來源、安定性或其他可適當定義本質的特徵之文件保存為試驗委託者的責任。  
 註5. 遭破壞或裁切之試驗物質/對照物質，將於實驗後以丟棄處理，若需留樣或退回請於“特殊需求”中註明，並說明試驗後試驗物質或對照物質需處理的方式。若有人建議採取量或委託建議量亦可填寫於“特殊需求”中。試驗物質執行試驗後需留樣的樣品需微的處理方式。  
 註6. 若此空格不適用，請填寫N/A或N.A.，勿留空白處。

**SIGATURE OF STUDY PERSONNEL**  
**Skin Sensitization Study (Maximization Test)**  
**Magnesium Alloy Specimen**

Study Director:

臺灣檢驗科技股份有限公司

Howard Kuo 2014.09.11

Facility Manager:

臺灣檢驗科技股份有限公司

[Signature] 2014.09.11

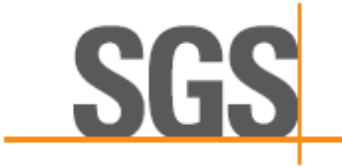

**TABLE OF CONTENTS**

**OBJECTIVE-----6**

**EXPERIMENT DESIGN-----7**

**RESULTS-----10**

**CONCLUSION-----11**

**REFERENCES-----11**

**TABLES-----12**

**TEST ARTICLE PHOTO-----13**

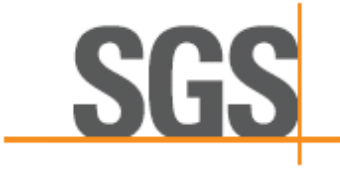

## OBJECTIVE

When direct contact with human tissues is anticipated, medical device should be carefully tested for biocompatibility according to the nature and duration of the contact to avoid potential physiological damage caused by hypersensitive substances produced or contaminated during manufacture. In this study, guinea pig skin sensitization study (Maximization test) was conducted to evaluate the possibility of skin sensitization after topical applications of the test article extracts on the skin of guinea pigs. The experiment was performed by following ISO 10993-10 and Leon Biotech Co., Ltd internal document of standard operating procedure SOP-T02.

## EXPERIMENTAL DESIGN

### 1. Test System

- A. Species/ Strain: Guinea Pig/ Hartley
- B. Resource: National Laboratory Animal Center, Taiwan
- C. Reason: According to ISO 10993-10
- D. Body weights/Age: 300~500 g or 1~6 month
- E. Sex: Female & male. The female guinea pigs were nulliparous and not pregnant
- F. Number: 30
- G. Quarantine/ acclimation: Once animals were introduced in-house, they were subjected to quarantine and acclimatize before treatment. Animals were selected based on health status by qualified staff..
- H. Identification
  - (1) Individual identification: Animals were identified by ear-marking.
  - (2) Group identification: Cages were properly labeled for identification including species/ strain, sex, in-housing date, IACUC number, animal I.D. number.
- I. Housing condition
  - (1)Environment temperature:  $25\pm 3^{\circ}\text{C}$
  - (2)Humidity: 30-70%
  - (3)Cage and animal number: 5 animals/cage
  - (4)Fodder/ Supply: Lab Diet; ad libitum
  - (5)Drinking water/ Supply: Tap water; ad libitum

### 2. Reagent

- A. 0.9% normal saline (Tai Yu Pharmaceuticla Co., Ltd. Lot No. ML0606)
- B. Freund's complete adjuvant (Sigma, F5881 , Lot No. SLBH7316V)
- C. Sodium dodecyl sulfate (Sigma, L5750 Lot No. BCBC7174V)

### 3. Extraction

According to ISO 10993-12 guidelines, the ratio of the test article to the extractant was 0.2g /mL. First extraction for induction I, 1.07g test article was immersed in 5.35mL of 0.9% saline and 2.33g test article was immersed in 11.65ml cottonseed oil. Second extraction for induction II, 1.18g test article was immersed in 5.9ml of 0.9% saline and 2.34g test article was immersed in 11.7mL cottonseed oil Third extraction for challenge, 1.2g test article was immersed in 6ml of 0.9% saline and 2.25g test article was immersed in 11.25mL cottonseed oil. Extract condition of 72 hours at  $50^{\circ}\text{C}$  with constant agitation were executed in this study. The pH adjustment, filtration and centrifugation were not conducted. After extraction, the appearance of non-polar extract were not different from the control solution, but the appearance of polar extract were

slight yellow.

#### 4. Grouping

| Test group                    | Control group |
|-------------------------------|---------------|
| 10 animals                    | 5 animals     |
| Polar extract of test article | 0.9% Saline   |

#### 5. Test Method

##### A. Induction phase I

- (1) Three kinds of solutions or emulsions were prepared from the control solution or test article extract as follow:

##### Polar group

- I. Emulsion of Freund's complete adjuvant (Sigma F5881) in 0.9% saline (Tai Yu Pharmaceutical Co., Ltd.) and volume ratio 1:1 (50% FCA).
- II. Solution of either test article extracts or 0.9% saline (Tai Yu Pharmaceutical Co., Ltd.).
- III. Emulsion of either test article extracts or 0.9% saline (Tai Yu Pharmaceutical Co., Ltd.) in 50% FCA in volume ratio 1:1.

##### Non-polar Group

- IV. Emulsion of Freund's complete adjuvant (Sigma F5881) in cottonseed oil (Sigma C7767) and volume ratio 1:1 (50% FCA).
- V. Solution of either test article extracts or cottonseed oil (Sigma C7767).
- VI. Emulsion of either test article extracts or cottonseed oil (Sigma, C7767) in 50% FCA in volume ratio 1:1.

- B. Furs of animal's backside were clipped with an electric animal shaver. Animals with scratches or skin diseases on the clipped skin surfaces were rejected from the study.

- C. Injections sites were paired, and there were six injection sites in the clipped zone of

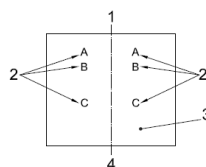



each animal (see figure below). Each solution was injected into injection sites matches A, B and C. The injected volume was 0.1 ml at each injection sites.

#### D. Induction phase II

- (1)  $7 \pm 1$  days later, the injection sites were applied with 10% of sodium dodecyl sulfate (Sigma, L5750) for  $24 \pm 2$  h.
- (2) Then, an appropriate absorbent gauze patch was saturated (about 8 cm<sup>2</sup>) with the test article extract or control solution, and applied to the clipped skin under an occlusive dressing secured by a wrap around the torso of the animal for another  $48 \pm 2$  h.

#### E. Challenge phase ( $14 \pm 1$ days after induction phase II)

- (1) The furs of flank of the animals were clipped. An appropriate site of this hairless area were selected and applied by the patches that soaked with the control solution or test article extract and then secured with an occlusive dressing.
- (2) The dressings and patches were removed after  $24 \pm 2$  h.

#### F. Observation and evaluation

- (1) The appearance of the challenge skin sites of the test and control animals were observed at  $24 \pm 2$  h and  $48 \pm 2$  h after removal of the dressings.
- (2) Skin reactions for erythema and oedema were graded according to the Magnusson and Kligman grading given in Table 1.
- (3) Grades greater than 1.0 in the test group generally indicate sensitization while grades of control animals are less than 1.0. If grades greater than 1.0 are noted in control animals, the reactions of test animals which exceed the most severe reaction are presumed to be due to sensitization.

## RESULT

1. Approximately 24±2 hours and 48±2 hours after challenge phase, neither the control nor the test group showed significant skin response on the treated areas. None of the test or control groups had a mean score increase of 1.0 or more in the observation period.
2. Individual Animal Grades skin reaction

polar group

| Group                                                             | Sex    | Number of animals | 24 hrs. after challenge phase | 48 hrs. after challenge phase |
|-------------------------------------------------------------------|--------|-------------------|-------------------------------|-------------------------------|
| Control<br>“0.9% saline”                                          | female | G-160725-01       | 0                             | 0                             |
|                                                                   |        | G-160725-02       | 0                             | 0                             |
|                                                                   |        | G-160725-03       | 0                             | 0                             |
|                                                                   |        | G-160725-04       | 0                             | 0                             |
|                                                                   |        | G-160725-05       | 0                             | 0                             |
| Mean score                                                        |        |                   | 0                             | 0                             |
| Test<br>“Laparoscopic electrocautery electrode Extracts (saline)” | male   | G-160801-46       | 0                             | 0                             |
|                                                                   |        | G-160801-47       | 0                             | 0                             |
|                                                                   |        | G-160801-48       | 0                             | 0                             |
|                                                                   |        | G-160801-49       | 0                             | 0                             |
|                                                                   |        | G-160801-50       | 0                             | 0                             |
|                                                                   |        | G-160801-51       | 0                             | 0                             |
|                                                                   |        | G-160801-52       | 0                             | 0                             |
|                                                                   |        | G-160801-53       | 0                             | 0                             |
|                                                                   |        | G-160801-54       | 0                             | 0                             |
|                                                                   |        | G-160801-55       | 0                             | 0                             |
| Mean score                                                        |        |                   | 0                             | 0                             |

## RELIABILITY CHECK

The positive control study was finished at 2014/07/04. According to ISO 10993-10 guidelines, positive control shall be performed at least once every six month.  $\alpha$ -hexylcinnamicaldehyde (Sigma 291285, Lot. No. MKAA2596) were used for positive control substances. The method for the positive control assay are identical to the method described above in this study. For the induction phase, 0.5% and 85%  $\alpha$ -hexylcinnamicaldehyde was used. For the challenge phase, 85%  $\alpha$ -hexylcinnamicaldehyde was used. Animals in the positive control group exhibited discrete erythema to confluent erythema at the challenge site. All reactions in the positive control group scored of 1, had a 100% incidence and 1.0 severity (24 hour score) are indicated that is positive sensitization reaction.

## CONCLUSION

The results indicated that the polar and non-polar extracts of “Magnesium Alloy Specimen” did not produce skin sensitization in guinea pigs.

## REFERENCES

1. Skin Sensitisation, OECD guideline for the testing of chemicals. #406 (1992) OECD.
2. Biological evaluation of medical devices- Part 10: Tests for irritation and skin sensitization. ISO 10993-10:2010.
3. Biological evaluation of medical devices- Part 12: Sample preparation and reference
4. materials. ISO 10993-12:2012.
5. Biological evaluation of medical devices- Part 2: Animal welfare requirements. ISO 10993-2:2006.



## TABLES

Magnusson and Kligman Scale (ISO 10993-10)

| Patch test reaction             | Grading scale |
|---------------------------------|---------------|
| No visible change               | 0             |
| Discrete or patchy erythema     | 1             |
| Moderate and confluent erythema | 2             |
| Intense erythema and swelling   | 3             |

## TEST ARTICLE PHOTO

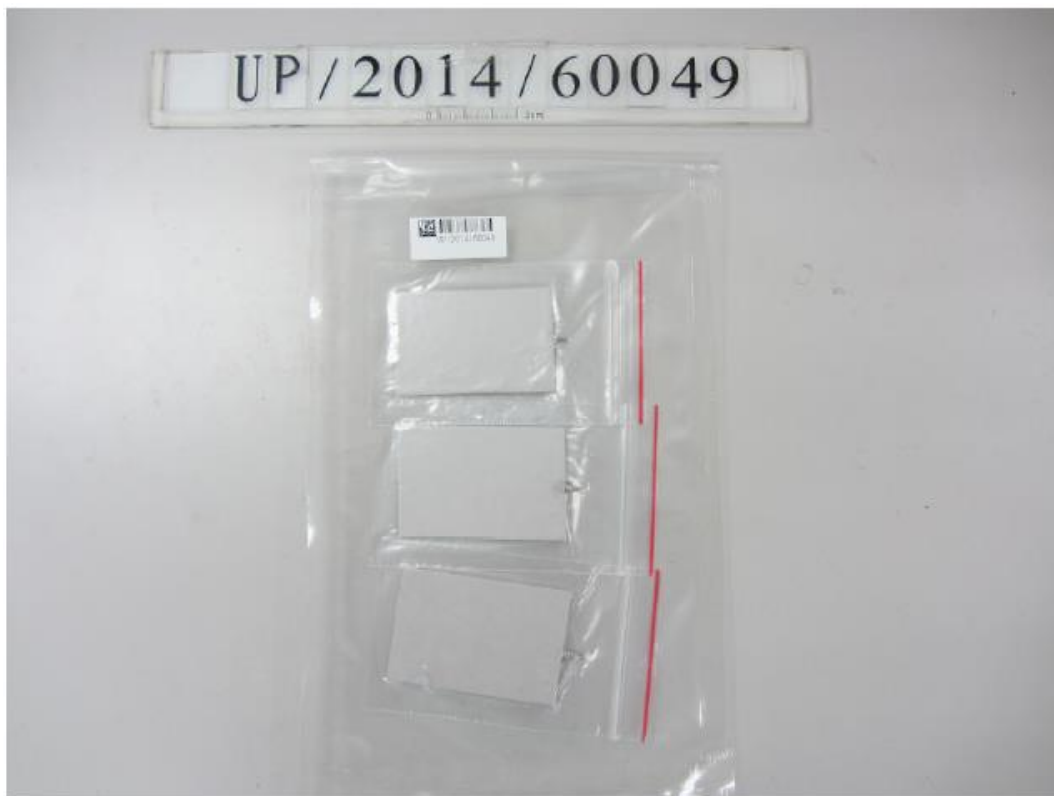

Supplement: s1 [file s1]
