# Supplementary material
Source: MDPI journal article supplement (https://www.mdpi.com/2079-6412/9/6/396)
Supplement: s1 [file s1]

Archive with 3 entries (3 files):
- cytotoxicity.pdf
- irritation test.pdf
- sensitization test.pdf
